# Supplementary material for: Identification of rs7350481 at chromosome 11q23.3 as a novel susceptibility locus for metabolic syndrome in Japanese individuals by an exome-wide association study
Source: PubMed Central journal article supplement (PMC5503614; doi:10.18632/oncotarget.16945), 2017-04-07
Supplement: oncotarget-08-39296-s001.pdf [file oncotarget-08-39296-s001.pdf]

# Identification of rs7350481 at chromosome 11q23.3 as a novel susceptibility locus for metabolic syndrome in Japanese individuals by an exome-wide association study

## SUPPLEMENTARY MATERIALS

## SUPPLEMENTARY FIGURES AND TABLES

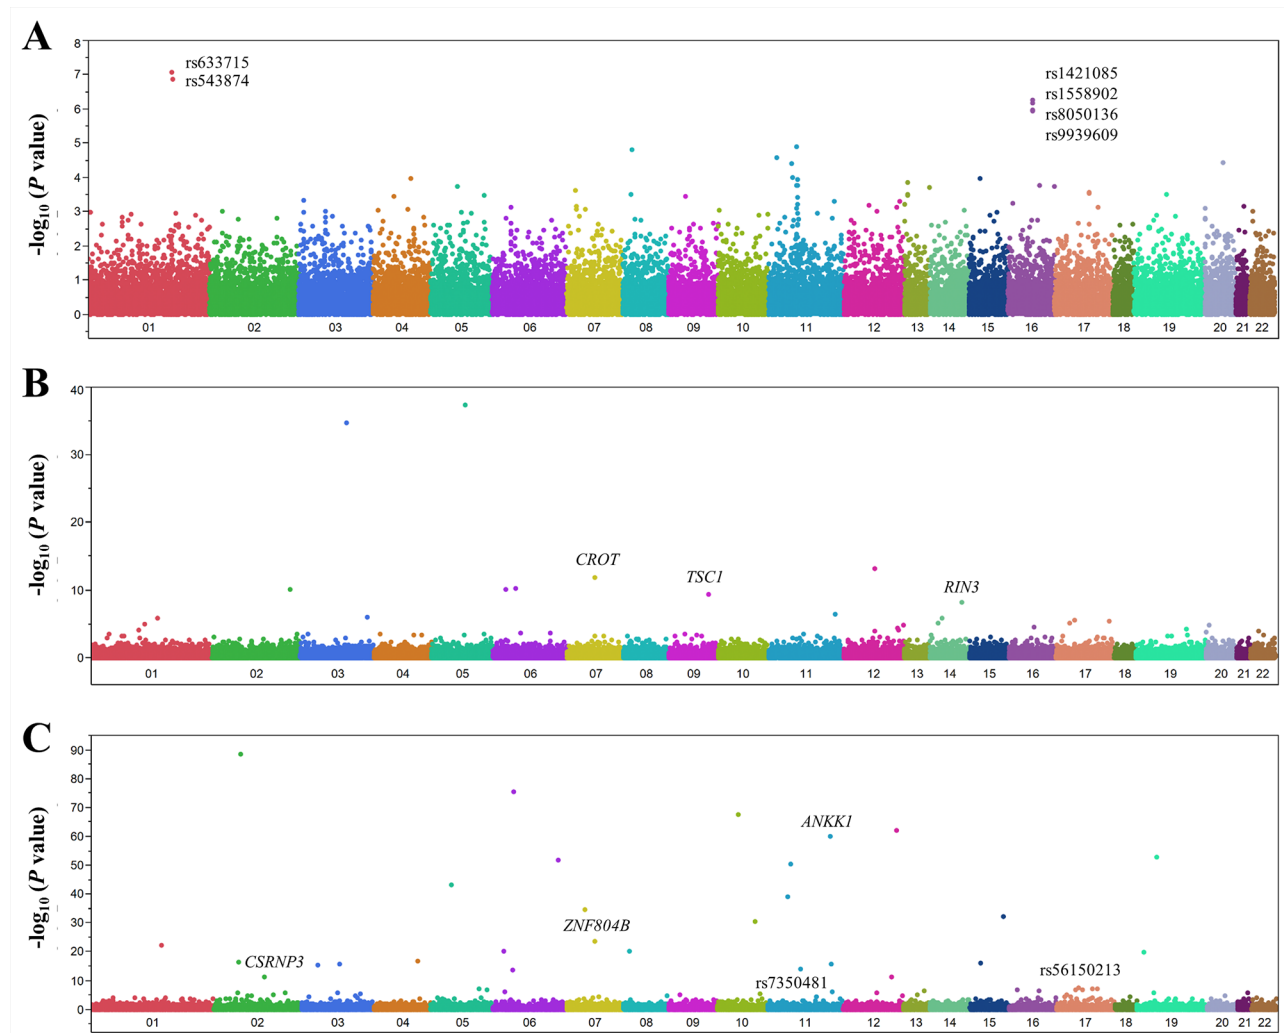

**Supplementary Figure 1: Manhattan plots of  $P$  values in the EWASs for BMI (A), obesity (B), and MetS (C).** The  $P$  values ( $y$ -axis) are shown as  $-\log_{10}(P)$  with respect to the physical chromosomal position of the corresponding SNPs ( $x$ -axis). SNPs or the corresponding genes identified in the present study are indicated.

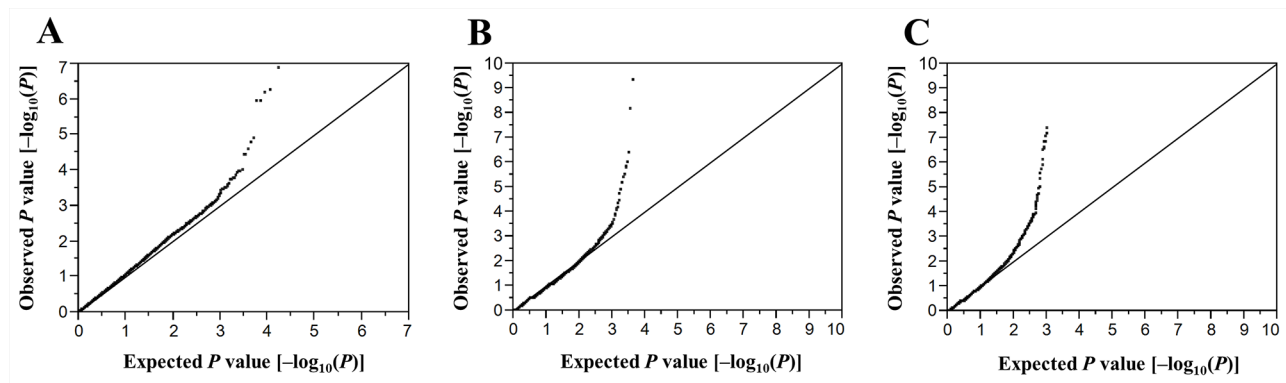

**Supplementary Figure 2: Quantile-quantile plots for  $P$  values in the EWASs of BMI (A), obesity (B), and MetS (C).** The observed  $P$  values ( $y$ -axis) are compared with the expected  $P$  values ( $x$ -axis) under the null hypothesis, with the values being plotted as  $-\log_{10}(P)$ .

Supplementary Table 1: Genotype distributions for SNPs associated ( $P < 1.21 \times 10^{-6}$ ) with obesity in the EWAS

| SNP         |                | Obesity         |                 |                | H-W <i>P</i> | Controls     |              |                 | H-W <i>P</i> |
|-------------|----------------|-----------------|-----------------|----------------|--------------|--------------|--------------|-----------------|--------------|
| rs3749745   | G/C<br>(E725Q) | GG              | GC              | CC             | 0.0307       | GG           | GC           | CC              | 0.1651       |
|             |                | 3820<br>(96.61) | 130<br>(3.29)   | 4 (0.10)       |              | 8665 (96.13) | 343 (3.80)   | 6 (0.07)        |              |
| rs2292661   | C/T<br>(T391M) | CC              | CT              | TT             | 0.1666       | CC           | CT           | TT              | 1.0000       |
|             |                | 3901<br>(98.66) | 52 (1.32)       | 1 (0.02)       |              | 8885 (98.57) | 129 (1.43)   | 0 (0)           |              |
| rs7970885   | G/A<br>(V200M) | GG              | GA              | AA             | 0.3322       | GG           | GA           | AA              | 0.2078       |
|             |                | 2584<br>(65.35) | 1213<br>(30.68) | 157<br>(3.97)  |              | 5876 (65.19) | 2827 (31.36) | 311 (3.45)      |              |
| rs7808249   | G/A            | GG              | GA              | AA             | 0.2366       | GG           | GA           | AA              | 0.8843       |
|             |                | 1750<br>(44.26) | 1786<br>(45.17) | 418<br>(10.57) |              | 4178 (46.36) | 3922 (43.51) | 913<br>(10.13)  |              |
| rs2068204   | C/T            | CC              | CT              | TT             | 0.7852       | CC           | CT           | TT              | 0.9819       |
|             |                | 1568<br>(39.66) | 1837<br>(46.46) | 549<br>(13.88) |              | 3612 (40.07) | 4187 (46.45) | 1215<br>(13.48) |              |
| rs10191097  | T/G            | TT              | TG              | GG             | 0.6994       | TT           | TG           | GG              | 0.6303       |
|             |                | 1988<br>(50.29) | 1638<br>(41.44) | 327<br>(8.27)  |              | 4494 (49.86) | 3728 (41.36) | 792 (8.78)      |              |
| rs757259    | G/A<br>(E244K) | GG              | GA              | AA             | 0.6748       | GG           | GA           | AA              | 0.8756       |
|             |                | 2801<br>(70.89) | 1056<br>(26.73) | 94 (2.38)      |              | 6348 (70.46) | 2432 (27.00) | 229 (2.54)      |              |
| rs1076160   | A/G            | AA              | AG              | GG             | 0.6072       | AA           | AG           | GG              | 0.2526       |
|             |                | 1188<br>(30.05) | 1974<br>(49.92) | 792<br>(20.03) |              | 2630 (29.18) | 4427 (49.12) | 1956<br>(21.70) |              |
| rs8018360   | C/T            | CC              | CT              | TT             | 0.0674       | CC           | CT           | TT              | 0.5917       |
|             |                | 2540<br>(64.24) | 1235<br>(31.23) | 179<br>(4.53)  |              | 5829 (64.67) | 2850 (31.62) | 335 (3.71)      |              |
| rs144079825 | G/C<br>(E258Q) | GG              | GC              | CC             | 1.0000       | GG           | GC           | CC              | 1.0000       |
|             |                | 3945<br>(99.77) | 9 (0.23)        | 0 (0)          |              | 8993 (99.77) | 21 (0.23)    | 0 (0)           |              |
| rs145491613 | A/G<br>(N388S) | AA              | AG              | GG             | 0.0537       | AA           | AG           | GG              | 0.1961       |
|             |                | 3925<br>(99.27) | 28 (0.71)       | 1 (0.02)       |              | 8926 (99.02) | 97 (0.97)    | 1 (0.01)        |              |

Data are numbers of subjects (percentages). H-W *P*, *P* value for Hardy-Weinberg equilibrium.

**Supplementary Table 2: Relation of SNPs to obesity as determined by multivariable logistic regression analysis**

| SNP         |                | Dominant |                     | Recessive |                     | Additive 1 |                     | Additive 2 |                      |
|-------------|----------------|----------|---------------------|-----------|---------------------|------------|---------------------|------------|----------------------|
|             |                | <i>P</i> | OR (95% CI)         | <i>P</i>  | OR (95% CI)         | <i>P</i>   | OR (95% CI)         | <i>P</i>   | OR (95% CI)          |
| rs3749745   | G/C (E725Q)    | 0.1972   |                     | 0.6765    |                     | 0.1716     |                     | 0.6819     |                      |
| rs2292661   | C/T (T391M)    | 0.6186   |                     | 0.0949    |                     | 0.5344     |                     | 0.0950     |                      |
| rs7970885   | G/A<br>(V200M) | 0.8568   |                     | 0.1319    |                     | 0.5446     |                     | 0.1573     |                      |
| rs7808249   | G/A            | 0.0241   | 1.09<br>(1.01–1.18) | 0.5172    |                     | 0.0307     | 1.09<br>(1.01–1.18) | 0.2039     |                      |
| rs2068204   | C/T            | 0.5791   |                     | 0.4700    |                     | 0.7347     |                     | 0.4257     |                      |
| rs10191097  | T/G            | 0.6657   |                     | 0.3958    |                     | 0.8564     |                     | 0.3859     |                      |
| rs757259    | G/A (E244K)    | 0.6263   |                     | 0.6047    |                     | 0.7110     |                     | 0.5816     |                      |
| rs1076160   | A/G            | 0.2661   |                     | 0.0340    | 0.90<br>(0.82–0.99) | 0.6676     |                     | 0.0410     | 0.89 (0.80–<br>0.99) |
| rs8018360   | C/T            | 0.6700   |                     | 0.0339    | 1.23<br>(1.02–1.47) | 0.8658     |                     | 0.0378     | 1.22 (1.01–<br>1.47) |
| rs144079825 | G/C (E258Q)    | 0.9551   |                     | ND        |                     | 0.9551     |                     | ND         |                      |
| rs145491613 | A/G (N388S)    | 0.1711   |                     | 0.5529    |                     | 0.1429     |                     | 0.5541     |                      |

Multivariable logistic regression analysis was performed with adjustment for age and sex. Based on Bonferroni's correction, a *P* value of <0.0011 (0.05/44) was considered statistically significant. OR, odds ratio; CI, confidence interval; ND, not determined.

**Supplementary Table 3: Genotype distributions for SNPs associated ( $P < 1.20 \times 10^{-6}$ ) with MetS in the EWAS.**

See Supplementary File 1

**Supplementary Table 4: Relation of SNPs to MetS as determined by multivariable logistic regression analysis.**

See Supplementary File 1

**Supplementary Table 5: Relation of SNPs identified in the present study to phenotypes examined in previous GWASs.**

See Supplementary File 1
